# Supplementary material for: Evaluation of a Commercial Culture-free Neutralization Antibody Detection Kit for Severe Acute Respiratory Syndrome-Related Coronavirus-2 and Comparison with an Anti-RBD ELISA Assay
Source: bioRxiv or medRxiv preprint supplement (doi:10.1101/2021.01.23.21250325), 2021-02-20
Supplement: Supplementary file [file media-1.pdf]

**Supplementary Table 1.** Composition of SARS-CoV-2 negative serum samples in National Microbiology Laboratory panel

| Infections among the SARS-COV-2 negative samples provided by NML | Number of negative NML samples<br>n, (%) |
|------------------------------------------------------------------|------------------------------------------|
| Hepatitis                                                        | 5 (25%)                                  |
| HIV                                                              | 3 (15%)                                  |
| Rabies                                                           | 5 (25%)                                  |
| SARS-1                                                           | 2 (10%)                                  |
| Syphilis                                                         | 5 (25%)                                  |

NML, National Microbiology Laboratory
